# Supplementary material
Source: PubMed Central journal article supplement (PMC10716496)
Supplement: mmc1.pdf [file mmc1.pdf]

**The American Journal of Human Genetics, Volume 110**

**Supplemental information**

**Identifying risk variants for embryo aneuploidy  
using ultra-low coverage whole-genome sequencing  
from preimplantation genetic testing**

**Siqi Sun, Mansour Aboelenain, Daniel Ariad, Mary E. Haywood, Charles R. Wageman, Marlana Duke, Aishee Bag, Manuel Viotti, Mandy Katz-Jaffe, Rajiv C. McCoy, Karen Schindler, and Jinchuan Xing**

A

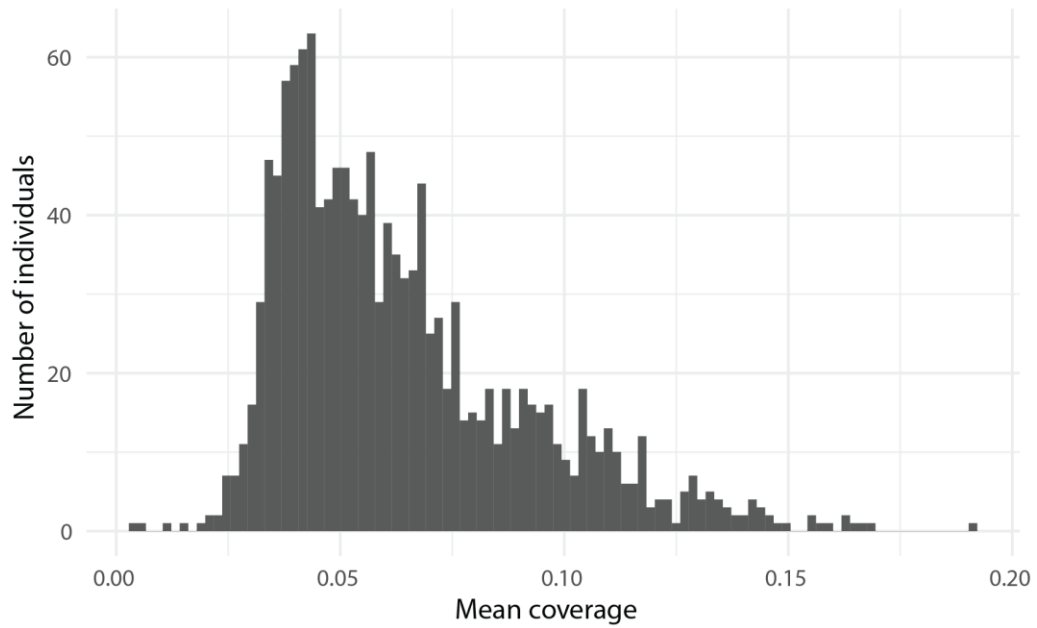

B

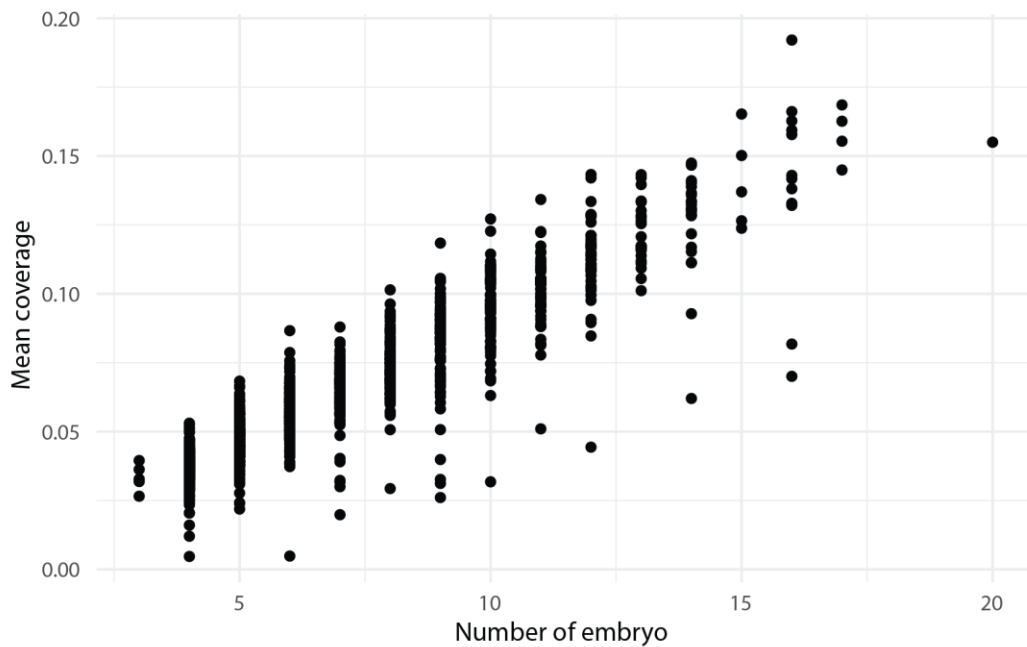

**Figure S1. Pooled sequencing coverage across 1,373 individuals. (A)** The mean sequence coverage of individuals. **(B)** Individual sequencing coverage correlation with the number of embryos sequenced.

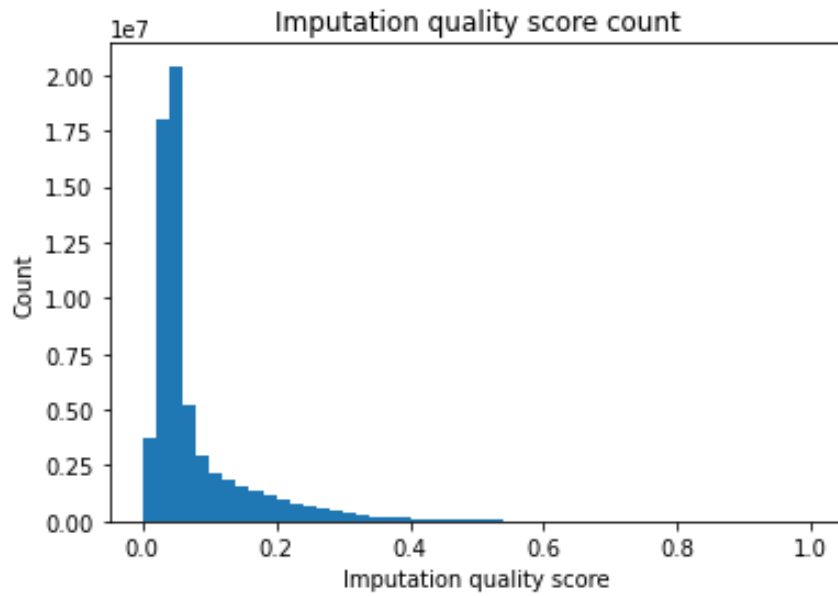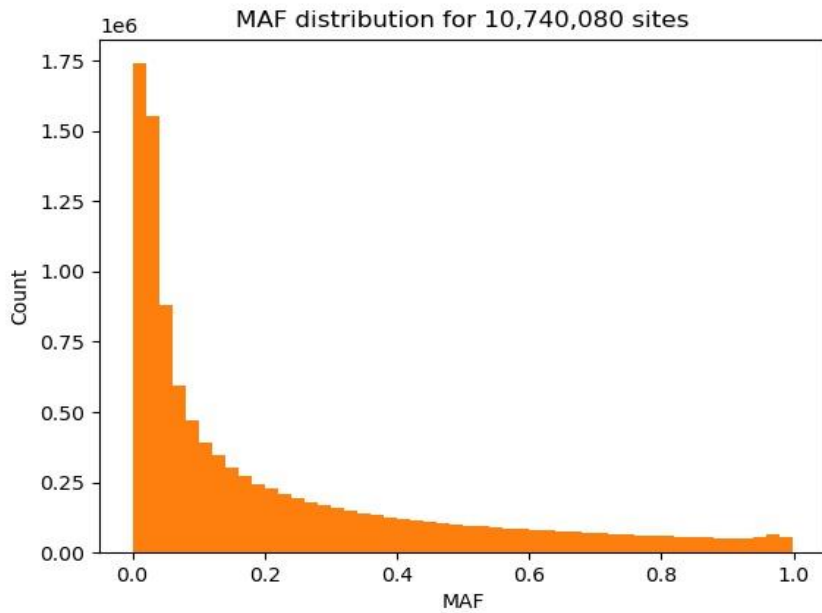

**Figure S2. Variant QC and distribution across chromosomes. (A)** Imputation quality score distribution of variants before filtering. **(B)** Minor allele frequency (MAF) distribution of variants before filtering.

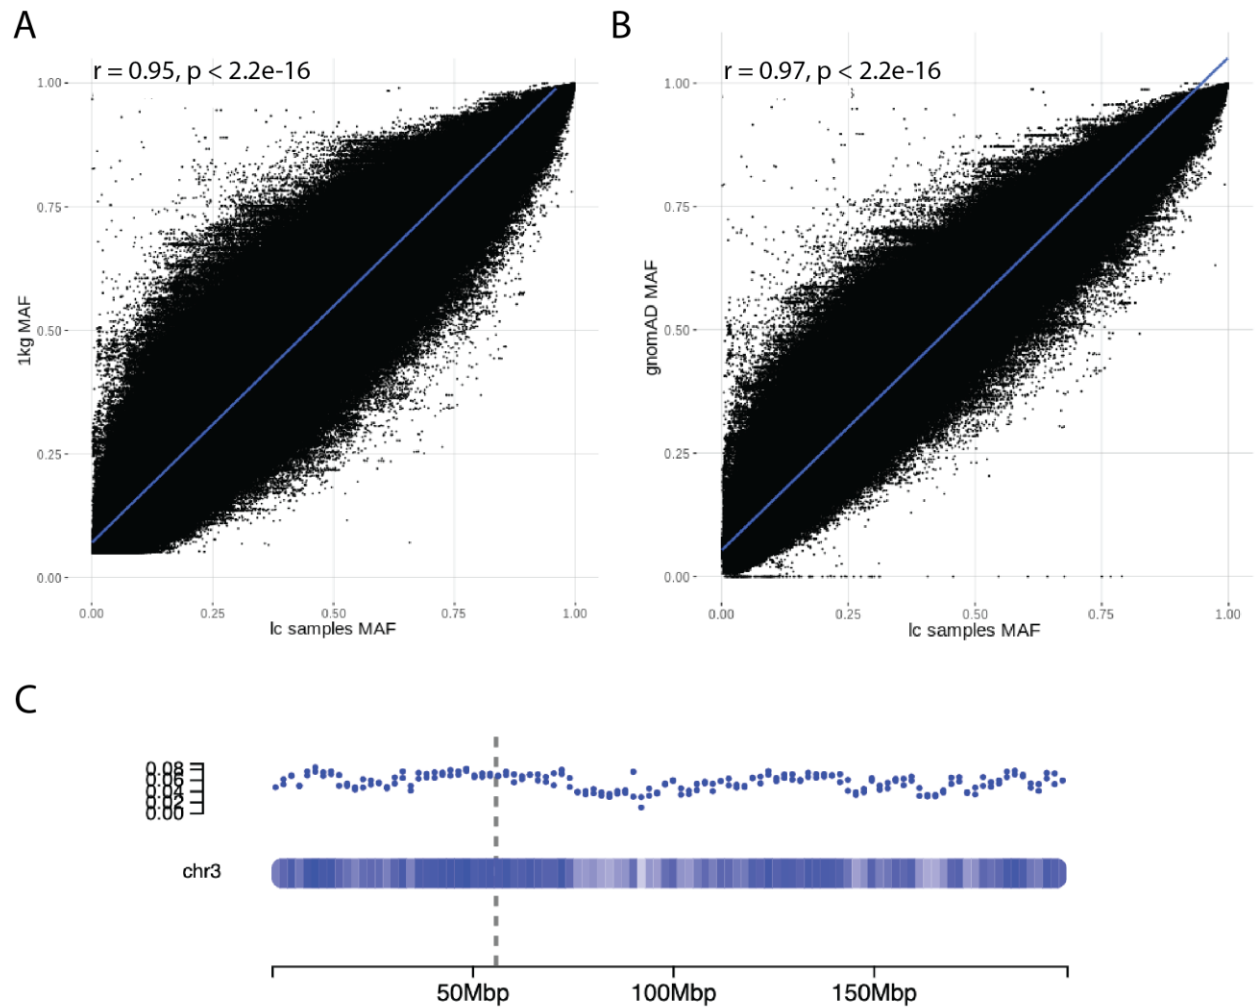

**Figure S3. Variant MAF correlation and sequencing depth distribution on chromosome 3.** The correlation of variant MAF distribution between the PGT-A samples and the 1000 Genomes **(A)** and gnomAD **(B)** samples. **(C)** The median sequencing depth on chromosome 3. The sequencing depth was calculated for non-overlapping one million base-pair regions across the chromosome.

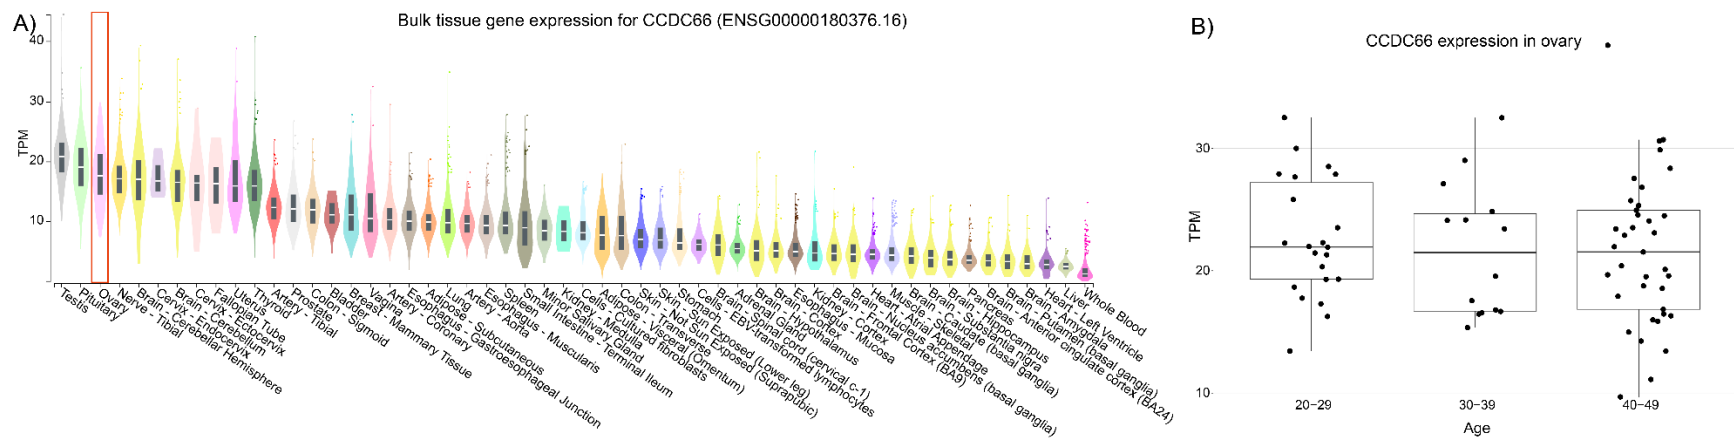

**Figure S4. *CCDC66* expression in GTEx samples. (A)** *CCDC66* expression in different tissues in GTEx samples. Ovary is labelled with a red box. **(B)** *CCDC66* expression in ovary in different age groups among GTEx samples. The whiskers in the box-whisker plot span a range that is 1.5 times the interquartile range (IQR). The data used for the analyses described in the figure were obtained from: the GTEx Portal on 09/21/23 and dbGaP accession number phs000424.v8.p2 on 09/21/23.
